# Supplementary material for: Type 1 diabetes, periodontal health, and a familial history of hyperlipidaemia is associated with oral microbiota in children: a cross-sectional study
Source: Springer Nature journal article supplement (doi:10.1186/s12903-022-02625-0), 2023-01-11
Supplement: MOESM1 [file 23911900]

**Table S1: Oral hygiene practices of study participants**

| Characteristic                          | Participants after filtering samples (n=72) |
|-----------------------------------------|---------------------------------------------|
| Self-reported brushing frequency (n, %) |                                             |
| No tooth brushing                       | 2 (2.8)                                     |
| Brushes Sporadically                    | 14 (19.4)                                   |
| Brushes once a day                      | 29 (20.3)                                   |
| Brushes twice a day                     | 24 (33.3)                                   |
| Toothpaste with fluoride (n, %)         | 70 (97.2)                                   |
| Regular flossing (n, %)                 | 6 (8.3)                                     |

**Table S2: Contaminant ASVs identified in extraction blank and negative template controls.****Table S3: No interaction between periodontal pocket depth, glycated haemoglobin, and a family history of hyperlipidaemia.**

|                                          | Sum of Squares | F value | Pr (>F)  |
|------------------------------------------|----------------|---------|----------|
| Periodontal PD                           | 6.5486         | 1.2083  | 0.27578  |
| HbA1c                                    | 25.6292        | 4.7290  | 0.03336* |
| FHx Hyperlipidaemia                      | 12.6063        | 2.3261  | 0.13215  |
| Periodontal PD:HbA1c                     | 6.7710         | 1.2494  | 0.26785  |
| Periodontal PD:FHx Hyperlipidaemia       | 3.3294         | 0.6143  | 0.43606  |
| HbA1c:FHx Hyperlipidaemia                | 21.7358        | 4.0106  | 0.04946* |
| Periodontal PD:HbA1c:FHx Hyperlipidaemia | 6.9440         | 1.2813  | 0.26189  |

PD = pocket depth; FHx = family history of hyperlipidemia; HbA1c = glycated hemoglobin; \* 0.05 > p > 0.01.

**Table S4: Periodontal pocket depth and a family history of hyperlipidaemia dependently affect the oral microbiota.**

|                                    | Sum of Squares | F value | Pr (>F)     |
|------------------------------------|----------------|---------|-------------|
| Periodontal PD                     | 0.121          | 0.0220  | 0.882476    |
| HbA1c                              | 25.386         | 4.6078  | 0.035452 *  |
| FHx Hyperlipidaemia                | 56.926         | 10.3324 | 0.002012 ** |
| Periodontal PD:FHx Hyperlipidaemia | 39.573         | 7.1828  | 0.009255 ** |

PD = pocket depth; FHx = family history of hyperlipidaemia; HbA1c = glycated hemoglobin; \*  $0.05 > p > 0.01$ , \*\*  $p < 0.01$ .

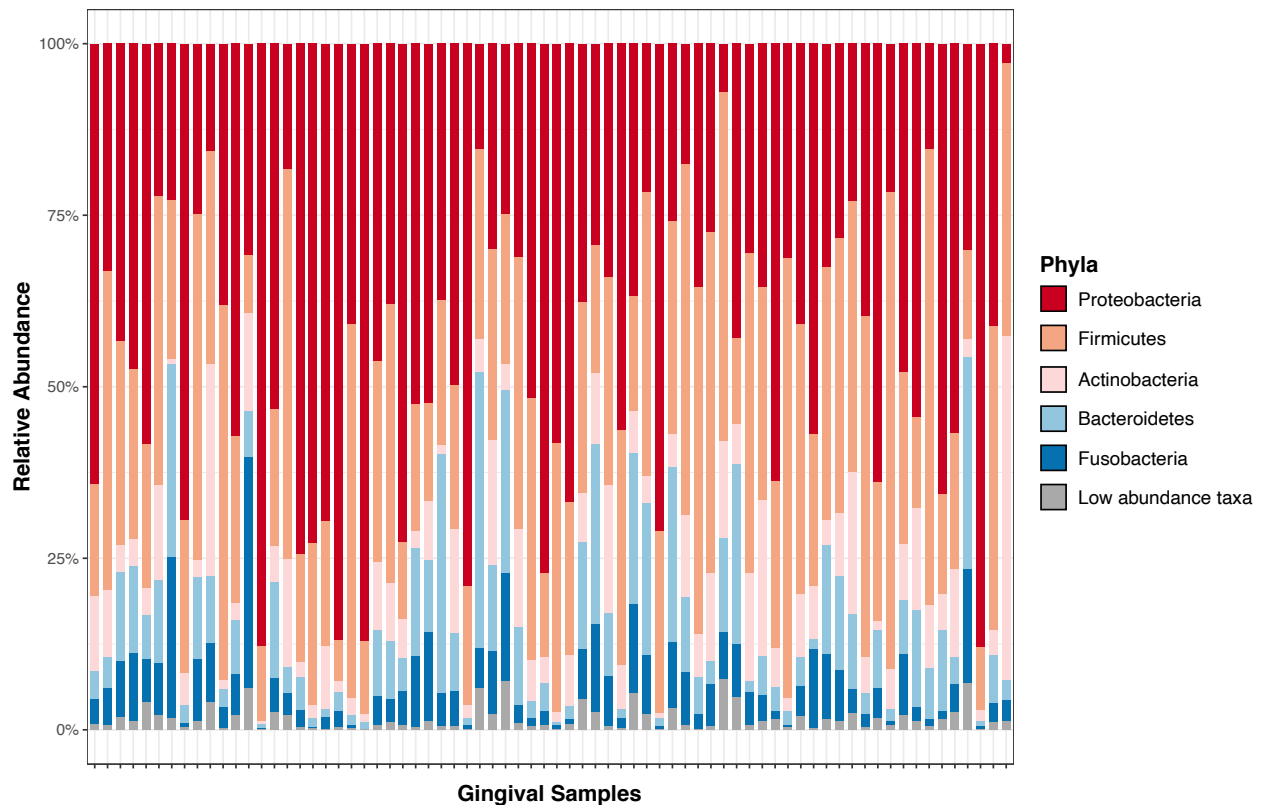

**Figure S1: The relative abundance of gingival samples at the phyla taxonomic level. Five dominant phyla (>2% relative abundance) were observed across all gingival samples from children with type 1 diabetes.**

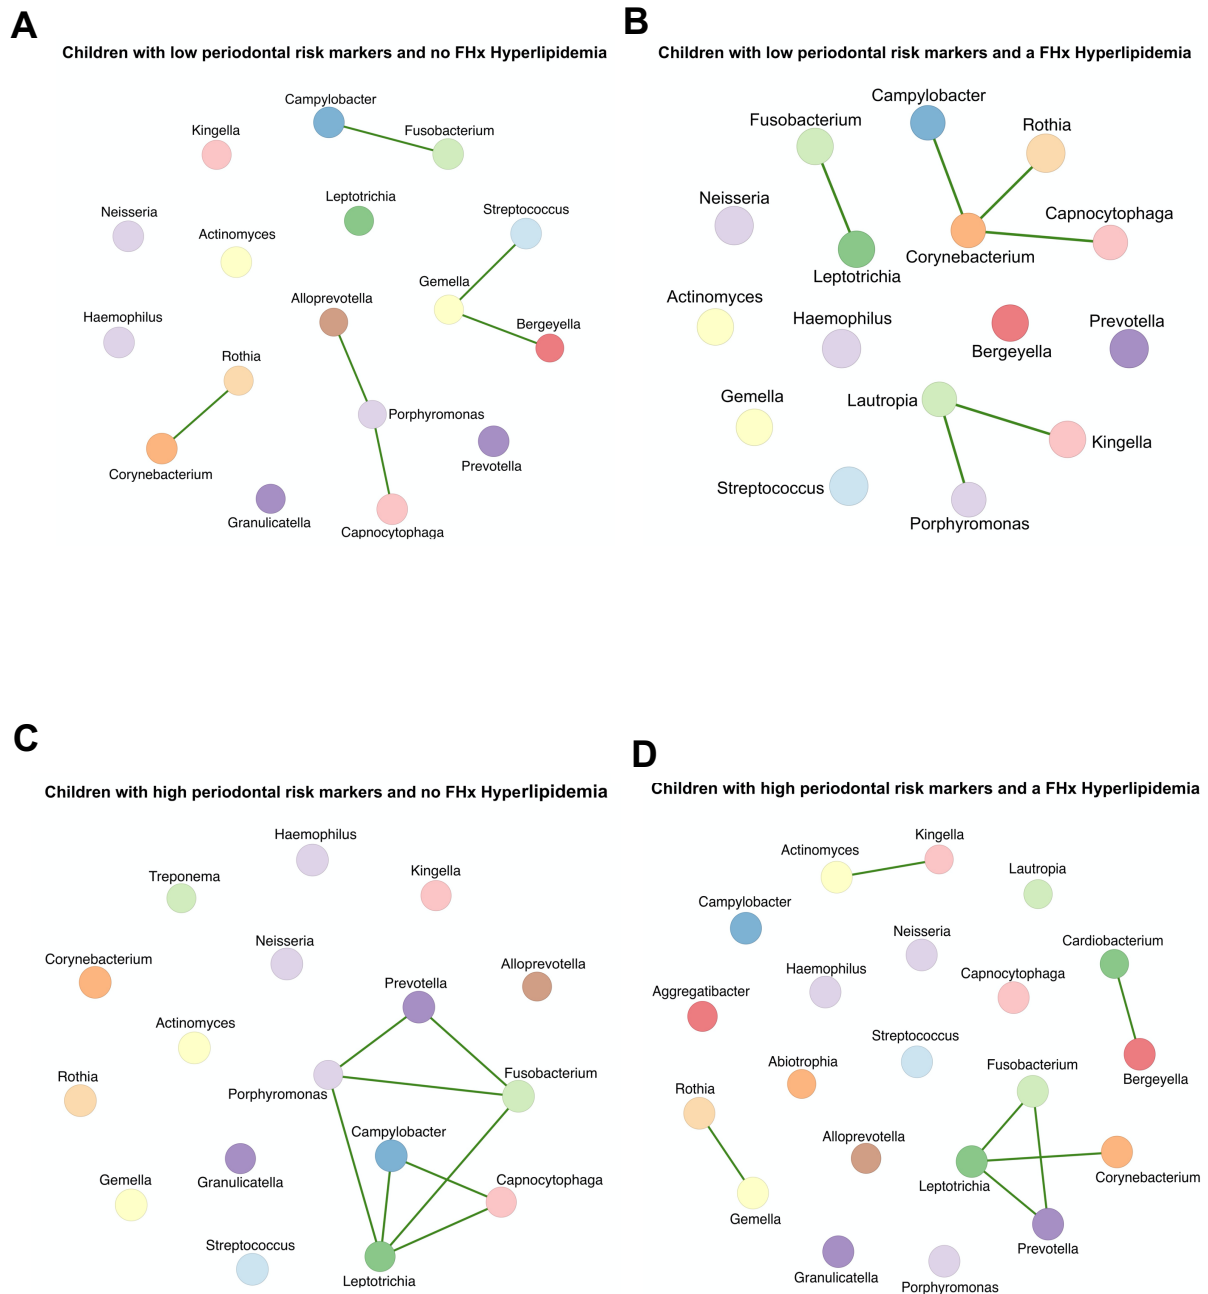

**Figure S2: Fewer co-occurrence networks were observed in children no periodontal risk markers and a family history of hyperlipidaemia.** Co-occurrence plots were generated using the Pearson co-efficient, to compare differences in hyperlipidaemia and periodontal status. Networks between children with no periodontal risk markers and those without (A) or with (B) a family history of hyperlipidaemia were distinct, with fewer networks observed in periodontally healthy children with a family history of hyperlipidaemia. In children with high-risk periodontal markers, frequently observed periodontal pathogens were shown to co-occur in both children without (C) and (D) with a family history of hyperlipidaemia.
